# Supplementary material for: A bistable hysteretic switch in an activator–repressor regulated restriction–modification system
Source: PubMed Central journal article supplement (PMC3695507; doi:10.1093/nar/gkt324), 2013-04-27
Supplement: supp_gkt324_nar-00640-h-2013-File010.pdf [file supp_gkt324_nar-00640-h-2013-File010.pdf]

## SUPPLEMENTARY INFORMATION FOR:

### A bistable hysteretic switch in an activator-repressor regulated restriction-modification system

Kristen Williams,<sup>1</sup> Michael A. Savageau,<sup>2</sup> and Robert M. Blumenthal<sup>1\*</sup>

<sup>1</sup> Department of Medical Microbiology & Immunology, and Program in Bioinformatics, University of Toledo, Toledo, OH 43614, USA; and <sup>2</sup> Biomedical Engineering Department, and Microbiology Graduate Group, University of California, Davis, CA 95616, USA

\* To whom correspondence should be addressed. Tel: +01 419 383 5422; Fax: +01 419 383 3002; Email: Robert.Blumenthal@utoledo.edu

**Table S1. Oligonucleotide primer pairs used for QRT PCR**

| Target        | Primer sequence                                                 |
|---------------|-----------------------------------------------------------------|
| <i>pvullM</i> | 5'- AAACGCCGATGCCGCAACATATTC<br>5'- TTGATGGGTATTAAGCGCATCCCG    |
| <i>pvullR</i> | 5'- TGGTGGAAAGTTGCTTCAAGTCCT<br>5'- TGCGATACCACGGTATATGGCAA     |
| <i>pvullC</i> | 5'- CAAATCCTTTATCAGCCCGATTAACCC<br>5'- AGGCATTTGCTATTCGCTCAATGT |
| <i>cat</i>    | 5'- ATCACAAACGGCATGATGAA<br>5'- GCGTGTTACGGTGAAAACCT            |
| <i>amp</i>    | 5'- ATAATACCGGCGCACATAGC<br>5'- TTTGCCTTCCTGTTTTTGCT            |
| <i>lacZ</i>   | 5'- ACTATCCCGACCGCCTTACT<br>5'- TAGCGGCTGATGTTGAACTG            |
| <i>kan</i>    | 5'- TTATGCCTCTTCCGACCATC<br>5'- GCCTGAGCGAGACGAAATAC            |
| <i>tet</i>    | 5'- GACAGCATCGCCAGTCACTA<br>5'- GCGTAGAGGATCCACAGGAC            |

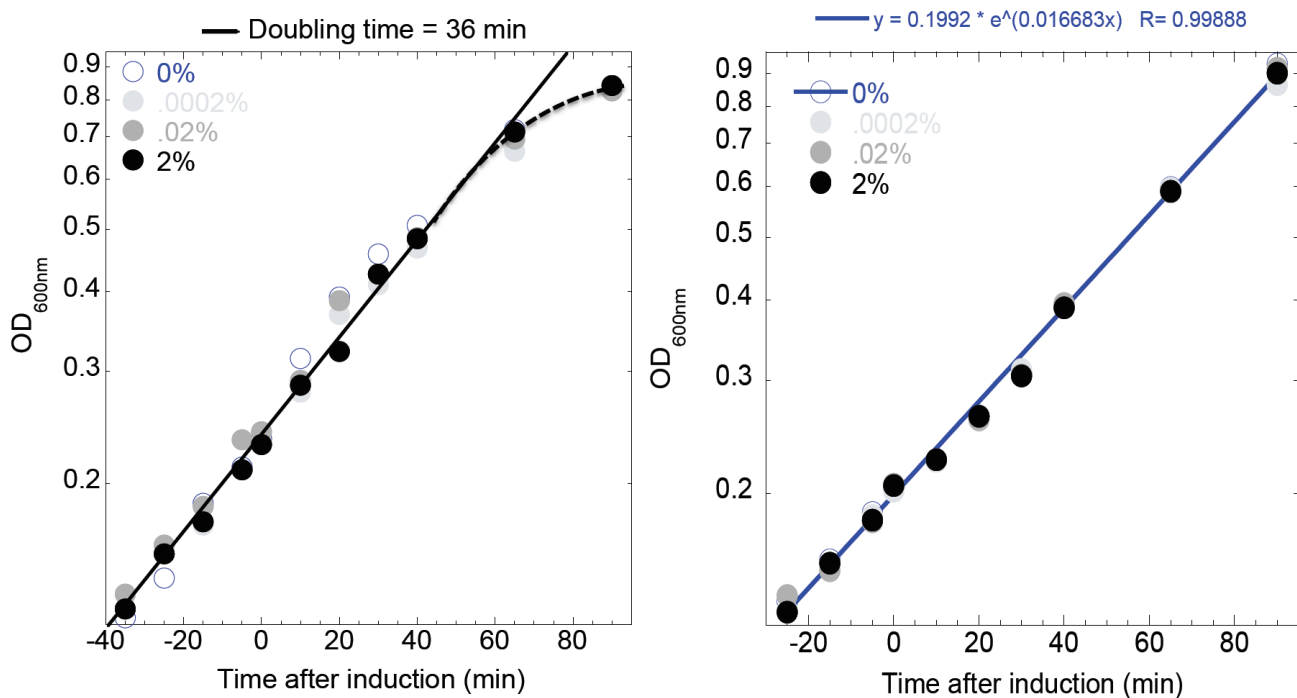

**Figure S1. Growth curves for induction kinetics cultures.** Two strains are being used, both in the *E. coli* TOP10 background, that differ only in the nature of the plasmid-borne *PpvulICR* promoter: either WT or a nonrepressing mutant. These cultures were used for the experiments shown in Figure 4. **A.** WT promoter/operator strain. At time = 0, the indicated amount of arabinose was added to a culture growing logarithmically in MOPS-rich medium. No significant effect was seen on growth; doubling time was ~36 min. **B.** Nonrepressing promoter strain. The cultures gave a doubling time of 41.6 min (~15% slower than WT).

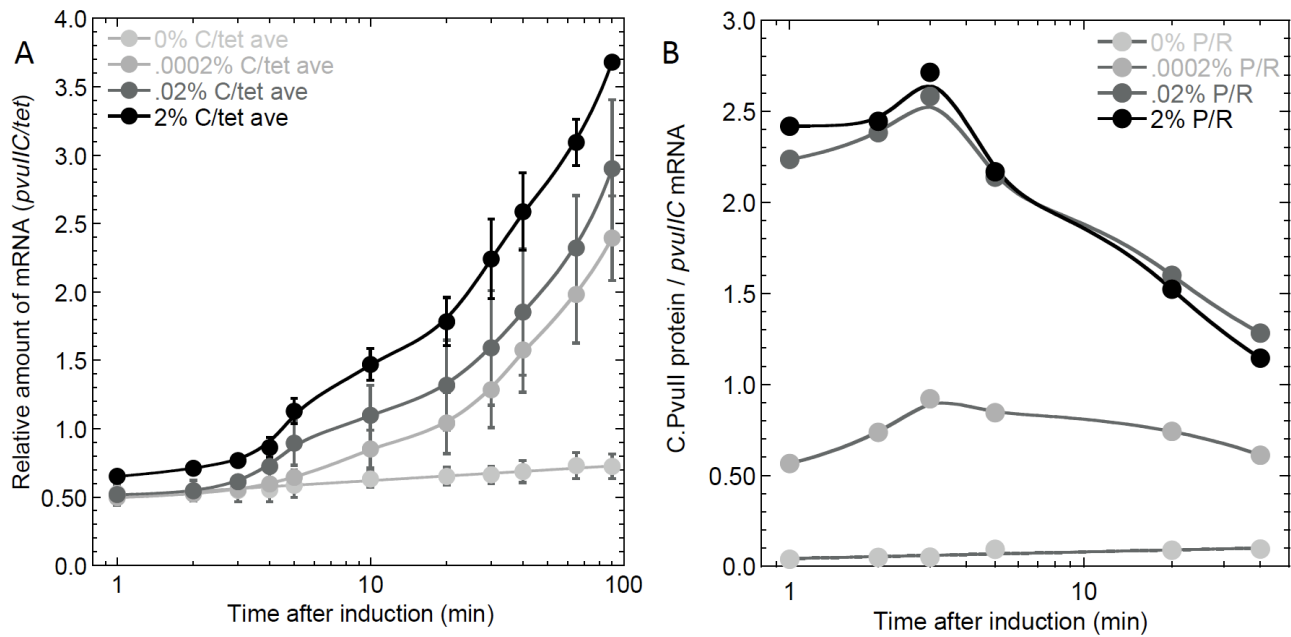

**Figure S2. Induction profile of *pvullC*.** **A.** *pvullC* mRNA divided by *tet* mRNA. At time = 0, various amounts of arabinose were added to an exponentially-growing culture in MOPS rich medium, and QRT-PCR was used to measure mRNA levels. Data shown are the averages ( $\pm$  range) from two independent experiments using the two *E. coli* TOP10 strains used in this work. One is the strain carrying the WT promoter/operator (on a second plasmid), while the second is the strain with nonrepressing operator on the second plasmid. In both cases, the strain background and the plasmid carrying the *ParaBAD-pvullC* fusion are identical. **B.** Protein/mRNA ratios. The protein levels are from Figure 3B, and the mRNA levels are from (A).

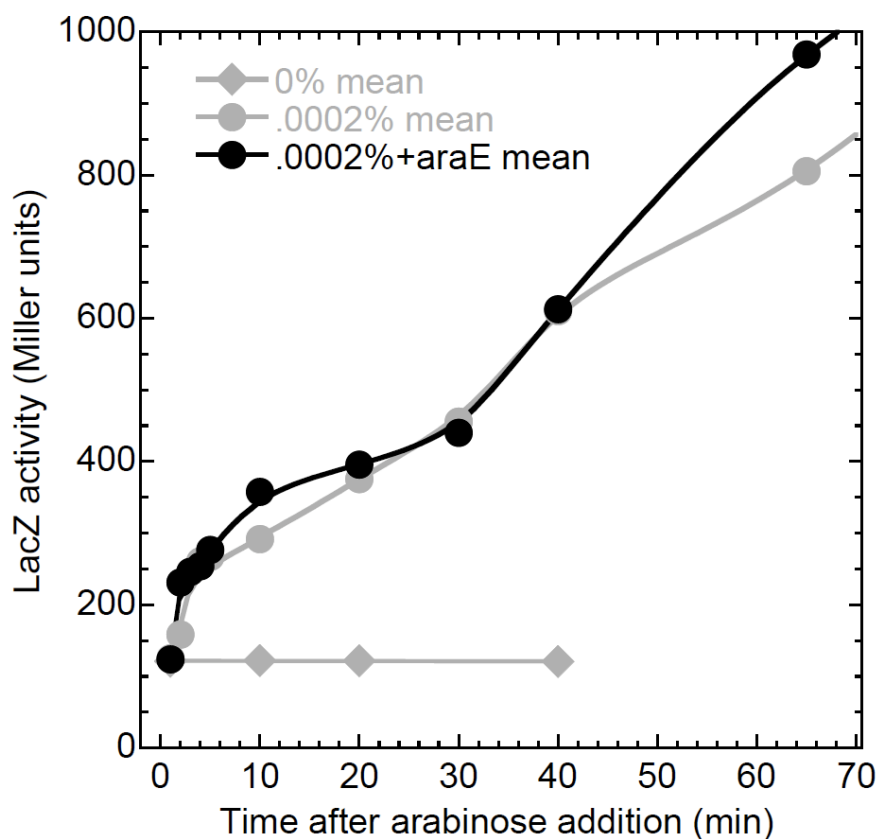

**Figure S3. Effect of constitutive *araE* expression on arabinose induction kinetics.** At lower concentrations of the inducer arabinose, induction of the arabinose transporter gene *araE* might make a subpopulation of cells more responsive to the inducer. Strains carrying the plasmids shown in Figure 4, with (black circles) or without (gray circles) the cloned *araE* gene added to the plasmid carrying the *pvuII*C gene, were grown and assayed as in Figure 5, panel C. The SE bars from triplicates are plotted but smaller than the symbols.
